# Supplementary material
Source: PubMed Central journal article supplement (PMC4779696)
Supplement: NIHMS754380-supplement-1.pdf [file NIHMS754380-supplement-1.pdf]

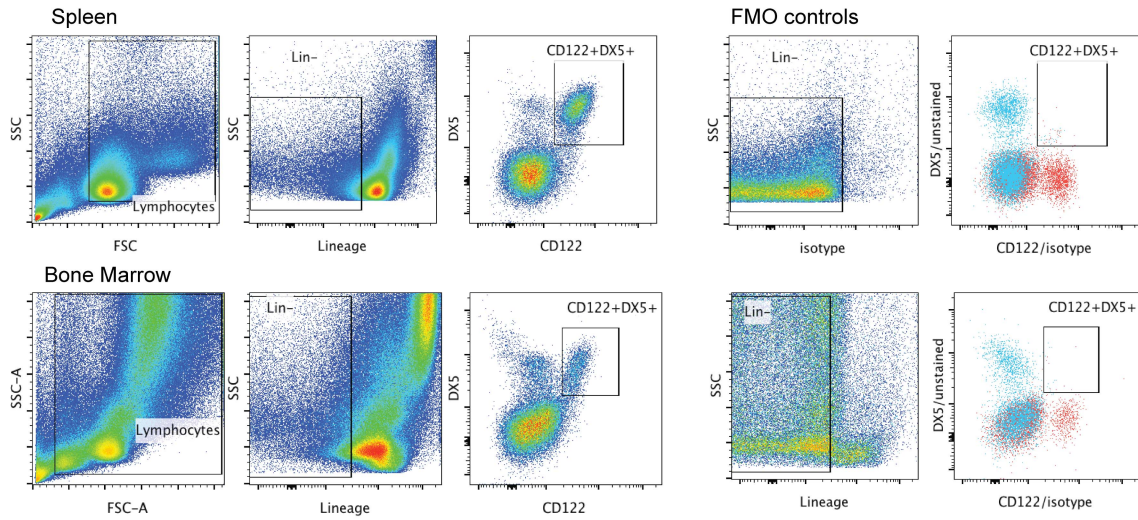

Supplemental Figure 1. Gating strategy for NK cells. Representative flow panels diagramming the gating path for NK cells. Lymphocytes were gated first on size and granularity, then for lineage-negative cells, and finally for CD122+DX5+ cells. The right panels show the applicable Fluorescence Minus One (FMO) controls for drawing the gates. Top, spleen. Bottom, bone marrow.

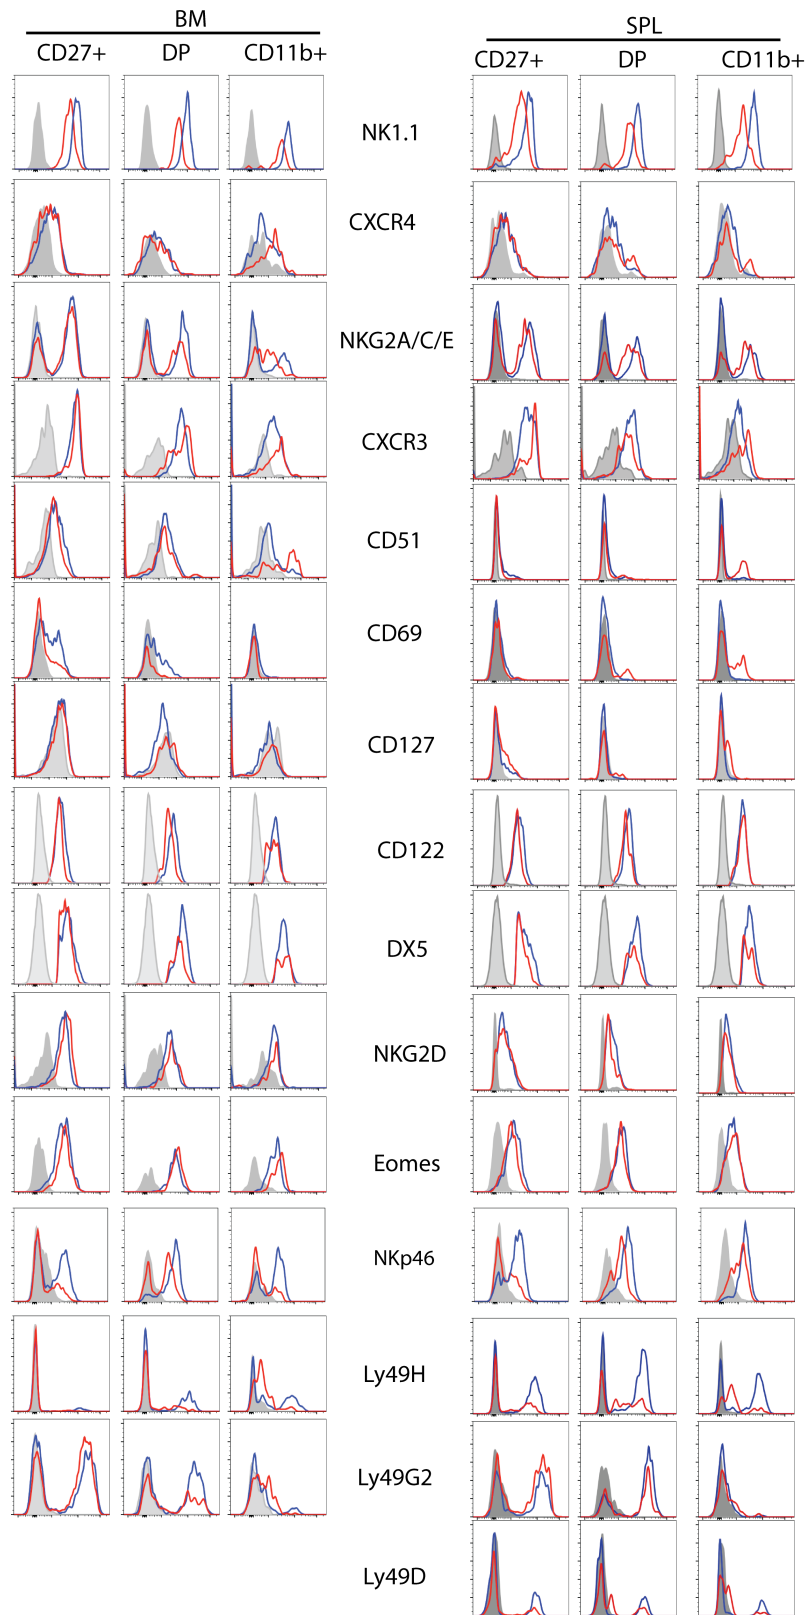

Supplemental Figure 2. Survey of expression of regulators in NKp46-SPPL3 KO NK cells. Representative flow panels of the indicated NK cell gate (Lin-CD122+DX5+) showing the profile of proteins in the spleen and bone marrow. The negative control is depicted in grey, NKp46-SPPL3 WT in blue, and NKp46-SPPL3 KO in red. CD51, DX5, and NK1.1 negative controls are unstained cells, others are isotype controls. For NKp46, NKG2D, Eomes, and CXCR4, control mice are SPPL3 fl/+; NKp46-iCre. For all others, control mice are SPPL3 fl/fl.
